# Supplementary material for: Copper(ii) complexes with peptides based on the second cell binding site of fibronectin: metal coordination and ligand exchange kinetics
Source: Royal Society of Chemistry journal article supplement (doi:10.1039/c5cp05798a), 2016-01-01
Supplement: c5cp05798a1.pdf [file c5cp05798a1.pdf]

Supporting Information for “Copper(II) complexes with peptides based on the second cell binding site of fibronectin: metal coordination and ligand exchange kinetics” by Silvia Pizzanelli, Claudia Forte, Calogero Pinzino, Antonio Magri and Diego La Mendola

### Potentiometric titrations: definition of the stability constant $\beta_{pqr}$ for the complex $\text{Cu}_p\text{L}_r\text{H}_q$

The species formed in the investigated systems can be characterized by the general equilibrium process (charges omitted):

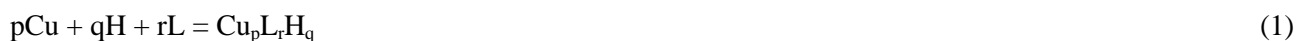

in which L represents the free peptide and  $\text{Cu}_p\text{L}_r\text{H}_q$  the complex.

The stability constant  $\beta_{pqr}$  is defined as:

$$\beta_{pqr} = [\text{Cu}_p\text{L}_r\text{H}_q] / [\text{Cu}]^p \cdot [\text{H}]^q \cdot [\text{L}]^r \quad (2)$$

Note that q may have negative values ( $\text{CuLH}_{-1}$  in the simplest case) due to the progressive deprotonation of the amide NH groups.

Table S1. Selected proton signals and relative line width for PHSFN in  $\text{D}_2\text{O}$  at  $\text{pD}=5.2$  before and after the addition of copper ion at room temperature. The peptide concentration was 29.7 mM.

| PHSFN   |                   |                                                                                               |                                   |                                                                    |
|---------|-------------------|-----------------------------------------------------------------------------------------------|-----------------------------------|--------------------------------------------------------------------|
| residue | proton            | chemical shift (ppm); <sup>a</sup><br>J coupling (Hz)                                         | line width (Hz)<br>with no Cu(II) | line width (Hz)<br>with 0.016<br>mole-<br>equivalents of<br>Cu(II) |
| P       | $\delta$          | 3.73;<br>$J_{\delta\gamma}=6.8$                                                               | 2.5                               | 3.2                                                                |
| H       | $\beta', \beta''$ | 3.26, 3.36;<br>$J_{\alpha\beta'}=9.0$<br>$J_{\alpha\beta''}=5.4$<br>$J_{\beta'\beta''}=-15.5$ | 3.0                               | 4.0                                                                |
|         | $\delta$          | 7.36;                                                                                         | 1.8                               | 4.0                                                                |
|         | $\epsilon$        | 8.71;<br>$J_{\delta\epsilon}=1.4$                                                             | 0.8                               | 4.0                                                                |
| S       | $\beta$           | 3.91;<br>$J_{\alpha\beta}=5.8$                                                                | 3.0                               | 3.2                                                                |
| F       | $\beta', \beta''$ | 3.19, 3.24;<br>$J_{\alpha\beta'}=8.0$<br>$J_{\alpha\beta''}=6.9$<br>$J_{\beta'\beta''}=-13.6$ | 3.0                               | 4.0                                                                |
|         | aromatic          | $\sim 7.4$                                                                                    |                                   |                                                                    |
| N       | $\beta', \beta''$ | 2.77, 2.87;<br>$J_{\alpha\beta'}=8.0$<br>$J_{\alpha\beta''}=5.6$<br>$J_{\beta'\beta''}=-15.6$ | 1.5                               | 2.0                                                                |

Table S2. Selected proton signals and relative line width for PHSEN in D<sub>2</sub>O at pD=5.2 before and after the addition of copper ion at room temperature. The peptide concentration was 33.6 mM.

| PHSEN   |         |                                                                                             |                                   |                                                                    |
|---------|---------|---------------------------------------------------------------------------------------------|-----------------------------------|--------------------------------------------------------------------|
| residue | proton  | chemical shift (ppm); <sup>a</sup><br>J coupling (Hz)                                       | line width (Hz)<br>with no Cu(II) | line width (Hz)<br>with 0.036<br>mole-<br>equivalents of<br>Cu(II) |
| P       | δ       | 3.74;<br>J <sub>δγ</sub> =6.7                                                               | 3.0                               | 3.5                                                                |
| H       | β', β'' | 3.31, 3.43;<br>J <sub>αβ'</sub> =8.7<br>J <sub>αβ''</sub> =5.6<br>J <sub>β'β''</sub> =-15.4 | 2.5                               | 3.2                                                                |
|         | δ       | 7.43;                                                                                       | 2.0                               | 2.7                                                                |
|         | ε       | 8.74;<br>J <sub>δε</sub> =1.4                                                               | 1.2                               | 2.0                                                                |
| S       | β', β'' | 3.96, 3.99;<br>J <sub>αβ'</sub> =5.3<br>J <sub>αβ''</sub> =5.9<br>J <sub>β'β''</sub> =-11.6 | 2.5                               | 3.2                                                                |
| E       | γ       | 2.61<br>J <sub>γβ</sub> =7.2                                                                | 3.5                               | 4.3                                                                |
| N       | β', β'' | 2.85, 2.94;<br>J <sub>αβ'</sub> =8.0<br>J <sub>αβ''</sub> =5.6<br>J <sub>β'β''</sub> =-15.6 | 2.0                               | 3.0                                                                |

<sup>a</sup> The <sup>1</sup>H frequency scale was externally referenced to the signal of acetone in D<sub>2</sub>O (2.22 ppm)<sup>1</sup>.

<sup>1</sup> H. E. Gottlieb, V. Kotlyar and A. Nudelman, *J. Org. Chem.*, 1997, **62**, 7512-7515.
